# Supplementary material for: Long‐term effects of single and combined introductions of antibiotics and bacteriophages on populations of Pseudomonas aeruginosa
Source: PubMed Central journal article supplement (PMC4831460; doi:10.1111/eva.12364), 2016-02-18

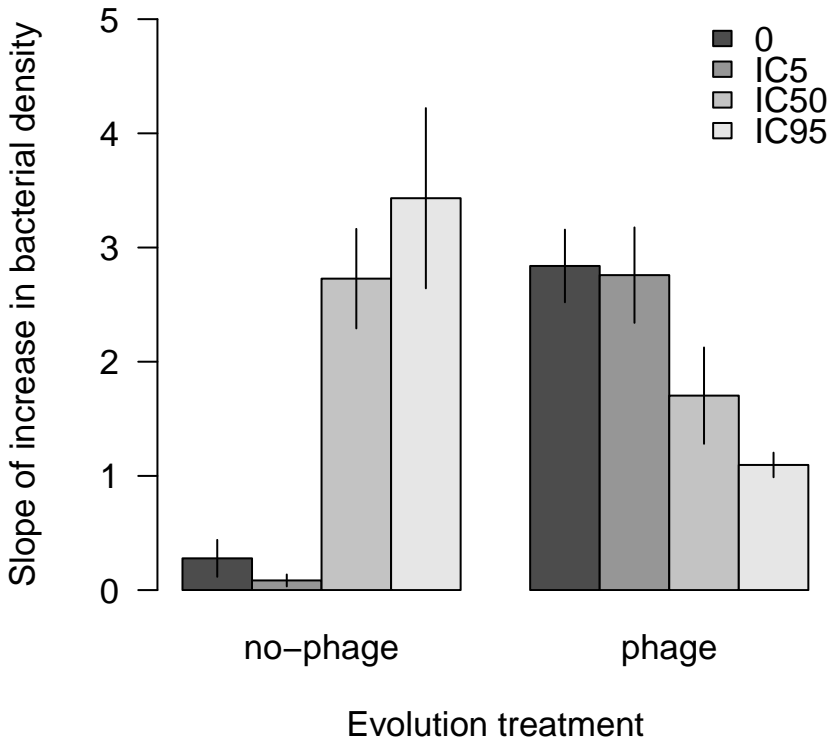

Supplement: EVA-9-583-s002.pdf [file EVA-9-583-s002.pdf]
