# Supplementary material for: Long‐term effects of single and combined introductions of antibiotics and bacteriophages on populations of Pseudomonas aeruginosa
Source: PubMed Central journal article supplement (PMC4831460; doi:10.1111/eva.12364), 2016-02-18

A)

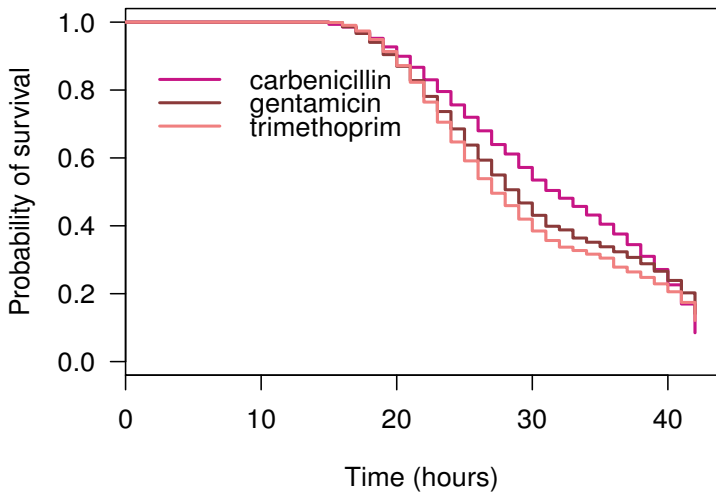

B)

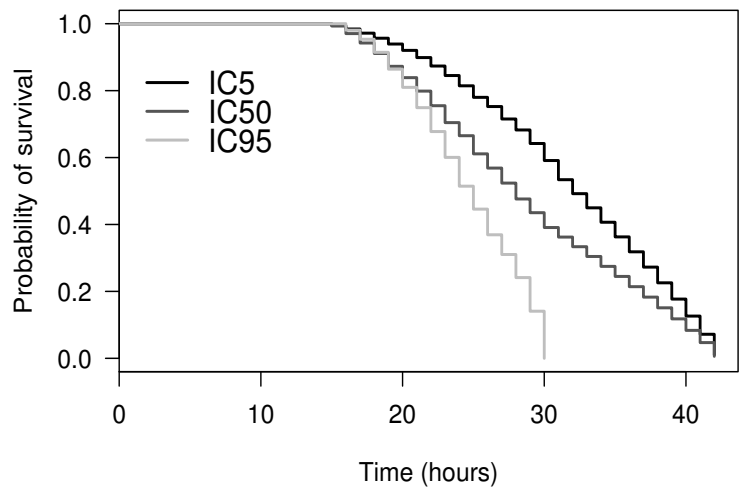

Supplement: EVA-9-583-s004.pdf [file EVA-9-583-s004.pdf]
